# Supplementary material for: Gene Co-Expression Network Analysis Provides Novel Insights into Myostatin Regulation at Three Different Mouse Developmental Timepoints
Source: PubMed Central journal article supplement (PMC4335066; doi:10.1371/journal.pone.0117607), 2015-02-19
Supplement: pone.0117607.s001.pdf [file pone.0117607.s001.pdf]

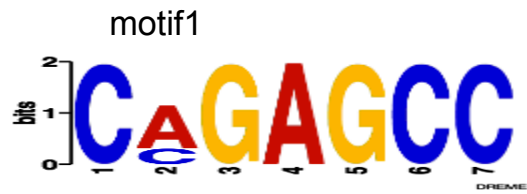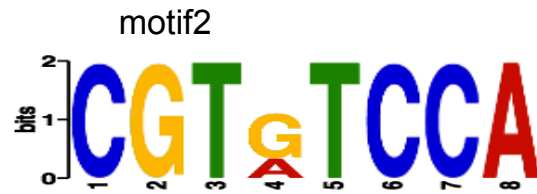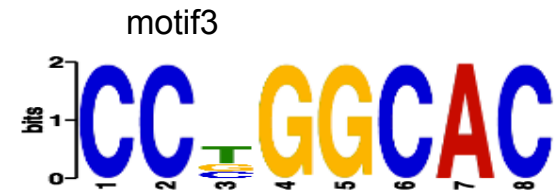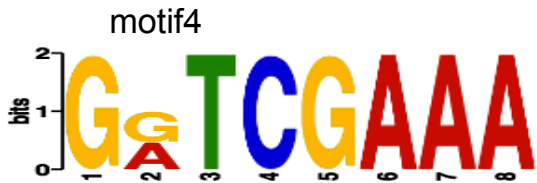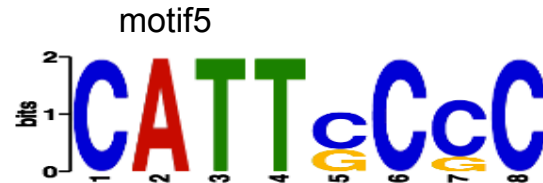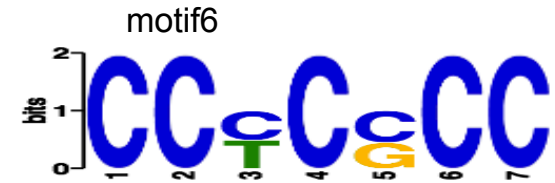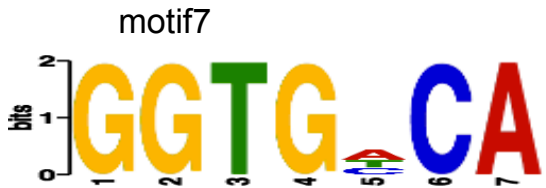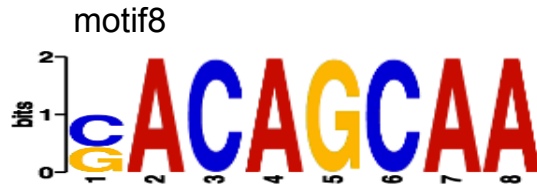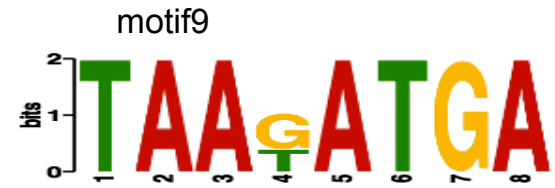

| Motif# | Sequence(IUPAC) | TOMTOM              |
|--------|-----------------|---------------------|
| 1      | CMGAGCC         |                     |
| 2      | CGTRTCCA        |                     |
| 3      | CCBGGCAC        |                     |
| 4      | GRTCGAAA        |                     |
| 5      | CATTSCSC        |                     |
| 6      | CCYCSCC         | Zfp281_primary, SP1 |
| 7      | GGTGHCA         |                     |
| 8      | SACAGCAA        |                     |
| 9      | TAAKATGA        |                     |

Over-represented motifs in genes upregulated by myostatin on d35

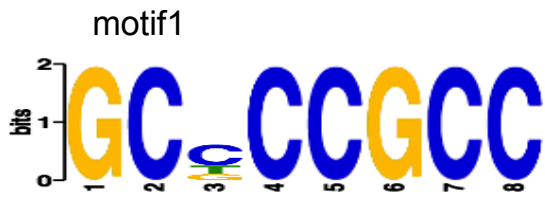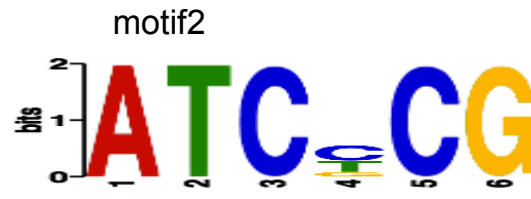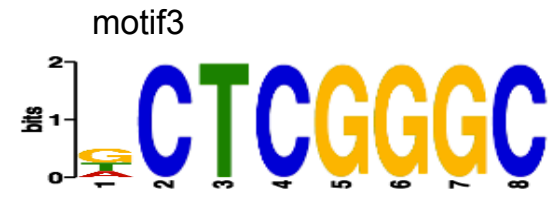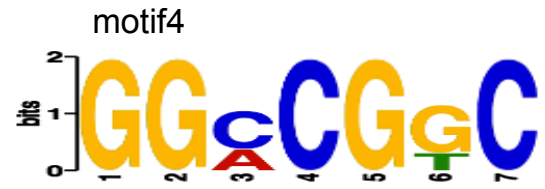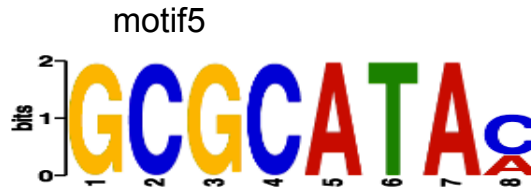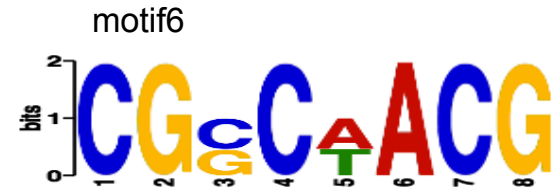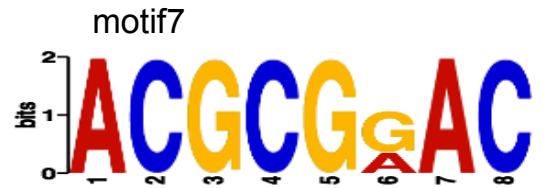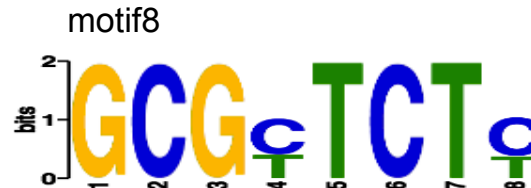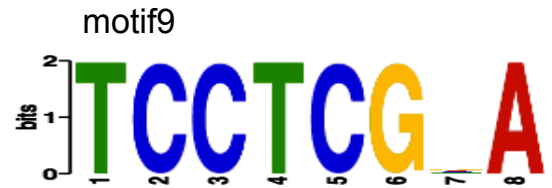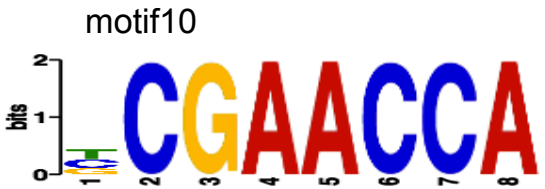

| Motif# | Sequence(IUPAC) | TOMTOM                      |
|--------|-----------------|-----------------------------|
| 1      | GCBCCGCC        | Smad3_secondary, CHA4, Klf4 |
| 2      | ATCBCG          |                             |
| 3      | DCTCGGGC        |                             |
| 4      | GGMCGKC         |                             |
| 5      | GCGCATAM        |                             |
| 6      | CGSCWACG        |                             |
| 7      | ACGCGRAC        |                             |
| 8      | GCGYTCTY        |                             |
| 9      | TCCTCGNA        |                             |
| 10     | BCGAACCA        |                             |

Over-represented motifs in genes downregulated by myostatin on d35
